# Supplementary material for: Evaluation of Colon-Specific Plasma Nanovesicles as New Markers of Colorectal Cancer
Source: MDPI journal article supplement (doi:10.3390/cancers13153905), 2021-08-03
Supplement: s1 [file s1]

# Evaluation of Colon-Specific Plasma Nanovesicles as New Markers of Colorectal Cancer

Inga Nazarova <sup>1</sup>, Maria Slyusarenko <sup>1</sup>, Elena Sidina <sup>1</sup>, Nadezhda Nikiforova <sup>1</sup>, Vladislav Semiglazov <sup>1,2</sup>, Tatiana Semiglazova <sup>1</sup>, Achim Aigner <sup>3</sup>, Evgeny Rybakov <sup>4</sup>, Anastasia Malek <sup>1,5</sup>

**Supplementary Table S1. List of colon epithelium-specific protein surface markers (complete data)**

| Protein name | UniProt ID | Colon-specific expression<br>1 | Surface membrane localization<br>2 | Exo Carta ID | CD9          |               |           |      | CD63         |               |           |      |
|--------------|------------|--------------------------------|------------------------------------|--------------|--------------|---------------|-----------|------|--------------|---------------|-----------|------|
|              |            |                                |                                    |              | CRC patients | health donors | CRC vs HD | AUC  | CRC patients | health donors | CRC vs HD | AUC  |
| CLRN3        | Q8NCR9     | 27.7                           | ***                                | 119467       | 7.71         | 2.8           | ns        | 0.76 | 3.2          | 1.4           | **        | 0.78 |
| GPA33        | Q99795     | 46.9                           | *****                              | 10223        | 4.8          | 4.1           | ns        | 0.54 | 2.1          | 1.5           | ns        | 0.67 |
| GCNT3        | O95395     | 37.6                           | ****                               | 9245         | 6.4          | 2.5           | ns        | 0.64 | 2.8          | 1.0           | *         | 0.71 |
| PIGY         | Q3MUY2     | 10.6                           | *****                              | 84992        | 7.2          | 3.3           | ns        | 0.66 | 3.2          | 1.3           | **        | 0.78 |
| REG4         | Q9BYZ8     | 55.5                           | ***                                | 83998        | 7.5          | 2.2           | *         | 0.78 | 3.0          | 1.0           | *         | 0.74 |
| MEP1A        | Q16819     | 100.5                          | *****                              | 4224         | 8.1          | 2.8           | *         | 0.79 | 3.6          | 1.5           | ns        | 0.81 |
| LGALS4       | P56470     | 190.6                          | ****                               | 3960         | 5.6          | 2.4           | ns        | 0.69 | 2.2          | 1.2           | ns        | 0.71 |
| Mucin 12     | Q9UKN1     | 25.2                           | *****                              | -            | 7.3          | 2.7           | *         | 0.75 | 3.0          | 1.2           | *         | 0.78 |
| PDCD6IP      | Q8WUM4     | 36.8                           | *****                              | 10015        | 5.7          | 4.1           | ns        | 0.6  | 2.5          | 1.7           | ns        | 0.66 |
| DHRS11       | Q6UWP2     | 38.7                           | **                                 | 360583       | 7.7          | 3.2           | ns        | 0.63 | 2.7          | 1.4           | ns        | 0.68 |
| CD47         | P16150     | 25.7                           | ***                                | 961          | 3.1          | 2.1           | ns        | 0.51 | 2.0          | 1.5           | ns        | 0.60 |
| VAMP1        | P23763     | 8.0                            | ***                                | 6843         | 2.8          | 2.4           | ns        | 0.50 | 2.0          | 1.3           | ns        | 0.55 |
| CEACAM5      | P06731     | 117.1                          | *                                  | 1048         | 4.3          | 3.5           | ns        | 0.54 | 1.9          | 1.3           | ns        | 0.54 |
| CD177        | Q8N6Q3     | 39.5                           | **                                 | -            | 3.6          | 2.7           | ns        | 0.58 | 2.1          | 1.6           | ns        | 0.57 |
| CDH17        | Q12864     | 184.4                          | ***                                | 1015         | 3.1          | 2.4           | ns        | 0.54 | 2.1          | 1.4           | ns        | 0.58 |
| CDH5         | P33151     | 6.6                            | ***                                | -            | 3.6          | 2.5           | ns        | 0.60 | 1.9          | 1.4           | ns        | 0.55 |

\*\*\*\*\* is the highest confidence and \* is the lowest
